1 **Title:** Alpha oscillations for processing saliency are generated by common cortical networks  
2 in visual attention tasks spanning wide spatial and spatio-temporal scales

3 **Abbreviated title:** Temporal structure of cortical saliency processing

4 **Author names and affiliation:**

5 Priyanka Ghosh, Dipanjan Roy, Arpan Banerjee

6 *Cognitive Brain Dynamics Lab, National Brain Research Centre, Manesar, Gurgaon-122052,*  
7 *Haryana, India*

8 **Corresponding author e-mail address:**

9 Priyanka Ghosh ([priyanka.b15@nbrc.ac.in](mailto:priyanka.b15@nbrc.ac.in) / [priyankaghoshmail@gmail.com](mailto:priyankaghoshmail@gmail.com))

10

11 **Number of pages:** 41

12 **Number of figures:** 5

13 **Number of tables:** 2

14 **Number of words:**

15 - Abstract: 250

16 - Significance statement: 119

17 - Introduction: 666

18 - Discussion: 1491

19

20 **Conflict of interest statement:** The authors declare no competing financial interests.

21 **Acknowledgements:** We thank Dr. Dipanjan Ray for his helpful comments on improving the  
22 readability of the manuscript, NBRC Core funds, and infrastructural support. PG was supported  
23 by Council of Science and Industrial Research (CSIR) fellowship (09/821(0044)/2017-EMR-  
24 I) from 03/08/2016, DR was supported by the Ramalingaswami fellowship (BT/RLF/Re-  
25 entry/07/2014) and DST-CSRI extramural grant (SR/CSRI/21/2016) and AB was supported by  
26 Ramalingaswami fellowship (BT/RLF/Re-entry/31/2011) and Innovative Young  
27 Biotechnologist Award (IYBA), (BT/07/IYBA/2013).

28

29 **ABSTRACT**

30 Reorientation of attention towards unexpected salient changes around us is critical for survival.  
31 Current understanding from fMRI studies point towards a network comprising of pre-frontal  
32 cortical areas (PFC), temporo-parietal junction (TPJ) and insula being responsible for  
33 processing and reorienting attention in a myriad of tasks. However, little is known about the  
34 temporal structure of the dynamical changes that govern neural systems while reorienting  
35 attentional focus to visual stimuli operating at very fast and very slow time scales. Using a  
36 custom-designed behavioral experiment and simultaneous EEG recordings, we investigated the  
37 effect of saliency across different task conditions to see if the underlying neural signatures  
38 involved in such rapid attentional shifts change with the task conditions. Interestingly, the EEG  
39 signal power at alpha band showed near identical rise in amplitude during salient conditions  
40 for a visual search and a dynamic motion tracking task. Source reconstruction underlying the  
41 enhanced alpha activity across task conditions revealed the involvement of lateral PFC, right  
42 insula and right TPJ which are regions of the Ventral Attention Network responsible for the  
43 deployment of bottom-up attention in response to salient stimuli. The results suggested a more  
44 general role of alpha oscillations which is dependent on the task context (saliency) but not on  
45 the task complexity or goals. Employing source-level effective connectivity analysis, we  
46 observed that the posterior right TPJ receives causal influences from the anterior right TPJ.  
47 Thus, we characterized the specific roles of both these regions in salient distractor processing  
48 for the first time through an EEG study.

49 **SIGNIFICANCE STATEMENT**

50 Regardless of a vast body of extant literature that has linked alpha oscillations to distractor  
51 suppression, the neural implementation of this mechanism of inhibition at the level of  
52 attentional networks lacks clarity. The importance of context specificity while processing  
53 saliency and the extent to which it reflects in the alpha modulation has garnered recent interest.  
54 Through an EEG study, we see the effect of salient distractors on two visual attention tasks: 1)  
55 involving spatial complexity and 2) involving spatio-temporal complexity. The results bring  
56 forth an interesting revelation where the neural patterns of alpha enhancement vis-à-vis  
57 saliency and the underlying neural networks are completely agnostic to the task conditions,  
58 thus elucidating the specific role of alpha oscillations in perceptual processing.

## 59 INTRODUCTION

60 The study of the neurobiology of attention requires a detailed understanding of the resource-  
61 wise allocation of attention both in space and time, depending on the task at hand. For instance,  
62 how the brain processes information to execute a visual search over a static image is entirely  
63 different from the sensory and cognitive processing deployed in executing a task involving  
64 tracking of a dynamic stimulus (Kulikowski & Tolhurst, 1973; Stigliani, Jeska, & Grill-  
65 Spector, 2017). Where in the static scenario, there is a fixed spotlight of attention for  
66 identification of the target location to primarily deal with the “spatial complexity”, a continuous  
67 object tracking is required during “temporally changing” stimulus patterns. For example, while  
68 sitting inside a moving train, constant tracking is required to read a station’s name or to identify  
69 our friend from the crowd present in the station, whereas no such time-bound tracking is  
70 required when the train is stationary. Unlike a static stimulus, attention to a dynamic stimulus  
71 has limits extending over space and time, because when the speed of the stimulus increases,  
72 tracking ability decreases (P Cavanagh & Alvarez, 2005). Previous studies have reported that  
73 the minimum dwell time for attention at a fixed location is about 200 ms whereas when the  
74 focus of attention is changing along with time, a given location on the moving target’s path can  
75 be selected for only brief time periods approximating to 50 ms (P Cavanagh, Battelli, &  
76 Holcombe, 2014). All these characteristics indicate that the processing of a dynamic stimulus  
77 is more complex than that of a static stimulus. Moreover, it is not just the degree of processing  
78 complexity but also the brain regions recruited and their neurophysiological underpinnings  
79 which may be entirely different for a static versus a dynamic task. Anatomical studies have  
80 shown that attention to static stimulus mostly involves contralateral brain regions whereas  
81 attention to dynamic stimulus is bilaterally organized (Battelli et al., 2001; Battelli, Pascual-  
82 Leone, & Cavanagh, 2007).

83 An important hallmark of attentional processing is the reorientation of attention towards  
84 unexpected salient stimuli that is critical for survival. A salient stimulus due to its ‘pop-out’  
85 feature stands out from its neighbors and can rapidly capture our attention even though we do  
86 not intend to attend to it. Such stimuli reorient our attentional resources in a stimulus-driven  
87 manner to elicit what is known as ‘bottom-up attention’ as opposed to goal-directed ‘top-down  
88 attention’ (Corbetta & Shulman, 2002; Corbetta, Patel, & Shulman, 2008) that orients our  
89 attention towards a pre-decided goal or target in a task. In our study, we compare the effect of  
90 such salient stimuli between spatial and spatio-temporal visual attention tasks using  
91 electroencephalography (EEG) and behavior.

92 The underlying brain networks responsible for processing salient stimuli are the Ventral  
93 Attention Network/ Stimulus-driven Attention Network comprising of the anterior insula, the  
94 right temporo-parietal junction (rTPJ) and the lateral prefrontal cortical areas comprising  
95 inferior frontal/middle frontal gyri (IFG/MFG) (Vossel, Geng, & Fink, 2014; Han & Marois,  
96 2014). The anterior insula is activated by the onset and offset of oddballs during attentional  
97 orienting/reorienting and is hypothesized to be associated with the capture of focal attention by  
98 salient stimuli (Menon & Uddin, 2010). On the other hand, fMRI studies have shown that the  
99 lateral pre-frontal cortex (IPFC) plays a role in the integration of sensory information between  
100 the anterior insula and TPJ (Kubit & Jack, 2013). Few studies have reported the involvement  
101 of both the left and the right TPJ and its role in reorientation in response to salient stimuli (Krall  
102 et al., 2015; Carter & Huettel, 2013; Decety & Lamm, 2007). Nonetheless, the functional role  
103 of TPJ is highly debated and so is its location, due to an unusually high degree of inter-  
104 individual variability in its anatomical structure (Van Essen, 2005; Caspers et al., 2006).  
105 Although multiple fMRI studies have evaluated the role of TPJ in context of saliency  
106 processing, as per our knowledge the present EEG study is the first to show causal influences  
107 among the constituent cortical loci involved in the deployment of bottom-up attention.

## 108 **METHODS**

### 109 **Participants**

110 22 healthy human volunteers (11 females and 11 males) aged between 21-29 (mean = 26.9, SD  
111 =  $\pm 2.15$ ) years were recruited for the study. All participants had University degrees or higher;  
112 were right handed (indexed by laterality score according to the Edinburgh handedness  
113 questionnaire); reported normal or corrected-to-normal vision; and declared no history of  
114 neurological or psychiatric disorders. The participants were requested to avoid the intake of  
115 any stimulant or medication (e.g., coffee, sedatives etc.) before coming for the experiment. The  
116 study was carried out following the ethical guidelines and prior approval of the Institutional  
117 Review Board of National Brain Research Centre, India which conforms to the standard set by  
118 the Declaration of Helsinki. Written informed consent was obtained from all participants before  
119 the commencement of the experiment and they were remunerated for the time of their  
120 participation.

### 121 **Rest block**

122 Before starting with the experimental task, five minutes of eyes open resting-state EEG data  
123 were collected from the participants. During this period, a blank black screen was presented on  
124 the monitor. The participants were asked to relax or think at free will while viewing the monitor  
125 screen placed before them. They were requested to make minimal head, body and eye  
126 movements.

### 127 **Stimulation blocks**

128 All the participants performed two visual attention-based tasks which incorporated two  
129 stimulus conditions: static and dynamic (**Figure 1**). The entire experiment was divided into 16  
130 blocks (8 blocks of each stimulus condition). Each block was presented in a random order

131 during the experiment but was never repeated. Both the visual tasks had three categories of  
132 trials: ‘Without Saliency Trials’ (WT), ‘Saliency Trials’ (ST) and ‘Neutral Trials’ (NT). The  
133 presentation order of the three categories was randomized in each block. The participants were  
134 not aware of the categorization in trials and were instructed only about the respective goals of  
135 the static and dynamic tasks before the experiment.

136 The NT served as a control to the participants’ attention. They were introduced to keep a check  
137 if the participants were attentive throughout the experiment and were just not making random  
138 responses. The NT were designed to give an impression of the most difficult trials to the  
139 participants, which if attended, were expected to produce the longest reaction times. The  
140 distribution of trials within a block for both the static and dynamic visual tasks is given in

141 **Table 1.**

142 Inter-stimulus intervals (ISI) between successive trials were randomly drawn from a uniform  
143 distribution with values ranging between 500 ms and 1500 ms (mean = 1000ms) in which a  
144 blank black screen was presented to avoid any saliency-related effects due to central fixation.

145 Stimulus presentation and behavioral response collection were done using Neurobehavioral  
146 Systems (NBS) Presentation software. Participants viewed the stimuli on a 21’’ LED screen  
147 (1280 X 1024 pixels) with a 60 Hz refresh rate placed on a 74-cm-high desktop. The center of  
148 the screen was placed within 10–20° of the participant’s line of sight, at a 60–70 cm distance.  
149 The stimuli were presented on a black background over which the static stimulus covered an  
150 area of 20 X 20 cm on the screen whereas the diameter of the aperture in the dynamic stimulus  
151 was 20 cm.

152 **Dynamic stimulus:** The dynamic stimulus viewing task was a four-alternative forced choice  
153 (4-AFC) task. The stimuli were designed using Psychtoolbox-3 in MATLAB R2016b and were  
154 exported as videos with a frame rate of 60 Hz. The participants were presented these videos



155 which consisted of white-colored equal-sized randomly moving dots where, a proportion of  
156 dots moved in a particular direction because of a certain coherence assigned to them. The  
157 coherence of the dots was kept at 0.6 for all the trials, which means that out of 100 dots, 60  
158 dots moved in one specific direction and the other 40 moved in random directions, uniformly  
159 distributed over 0-360 degrees. The speed of motion of all the dots was kept constant across all  
160 trials. The participants were instructed to identify the net direction of the moving dots which  
161 could either be left/right/up/down and respond using the respective arrow keys on the keyboard.  
162 Each video was presented for 2000 ms. The goal in the task was the same for both WT and ST,  
163 with the only difference in the latter being the emergence of a salient dot at a timestamp of 150  
164 ms from the onset of the trial, moving randomly within the same aperture as the other dots. The  
165 150 ms latency was decided with the purpose of creating an interference in the decision-making  
166 process (Teichert, Grinband, & Ferrera, 2016) of the participant while doing the goal directed  
167 task. The experimental schematic is illustrated in **Figure 1**.

168 **Static stimulus:** The static stimulus consisted of a two-alternative forced choice (2-AFC) task.  
169 The participants were presented with two similar pictures on the screen, successively. Each  
170 picture pair made up one trial and was randomly selected from a pool of twenty such picture  
171 pairs. Thirty such picture pairs were presented in one block. The pictures were naturalistic  
172 images (from both indoor and outdoor settings; no faces included) captured using a 16 MP  
173 camera keeping the settings same for all images. Using Adobe Photoshop CC 2015.5, a white-  
174 colored '+' shape (size 1/800th of the image) was added to all the images at random positions.  
175 Multiple copies of a single image with '+' shape at different positions were created such that  
176 there was no image and '+' position memory association. Each picture was presented for 2000  
177 ms. This was a visual search task where the participants had to search for the white-colored '+'  
178 shape in both the pictures and report its change in position in the second picture with respect  
179 to the first picture. For convenience, the participants were advised to imagine a vertical line

180 bisecting the screen into left and right halves. They were instructed to press the upward arrow  
181 key if the '+' sign moved to the same half of the screen in the second picture, i.e, change in  
182 position was on the same side of the imaginary line; and to press the downward arrow key if  
183 the '+' sign changed its position and moved to the other half of the screen i.e, from the left half  
184 to the right half or vice versa. The goal in the task was same for WT and ST, with the only  
185 difference in the latter being the introduction of a salient ('pop-out') object in the second picture  
186 at any random position. An example of one such stimulus is presented in **Figure 1**.

187

### 188 **EEG Data Acquisition**

189 Behavioral and EEG data were acquired in the EEG recording room where ambient noise, light,  
190 and other interferences were strictly controlled during the experiment to the same levels for all  
191 recording sessions. A Neuroscan EEG recording and acquisition system (Scan 4.3.3 &  
192 Presentation), which included an elastic cap (EasyCap) with 64 Ag/AgCl sintered electrodes  
193 and amplifier (SynAmps2), was used. The 64-channel EEG signals were recorded according  
194 to the International 10–20 system of electrode placement. Cz was the reference electrode,  
195 grounded to AFz and the impedance of all channels was kept below 10 k $\Omega$ . The data were  
196 acquired at a sampling rate of 1000 Hz. A Polhemus Fastrak system was used to record the 3D  
197 location of electrodes using a set of fiducial points (Cz, nasion, inion, left and right pre-  
198 auricular points) while the EEG cap was placed on the participant's head.

199

### 200 **Behavioral Data Acquisition**

201 All the responses were made on a computer keyboard using left/right/up/down arrow keys and  
202 were recorded through the NBS Presentation software by receiving triggers at keyboard

203 presses. Before the experiment, the participants were instructed to watch the stimulus carefully  
204 before making any response. They were asked to be as fast and as accurate as possible and  
205 respond to an ongoing trial before it's offset. A blank screen followed by the subsequent trial  
206 appeared automatically after the offset of the ongoing trial, regardless of whether the  
207 participants had responded or not. They were also asked to respond to all the trials. If more  
208 than one response was made for a trial, only the first response was considered for further  
209 analysis. A rest period was allowed after every block, with the participant deciding the length  
210 of the rest period to maintain minimum fatigue.

211

## 212 **EEG Data Preprocessing**

213 For both the static and the dynamic tasks, pre-processing steps and analysis pipeline were  
214 identical. All the pre-processing steps were done with the EEGLAB toolbox (Delorme &  
215 Makeig, 2004) and custom-written scripts in MATLAB ([www.mathworks.com](http://www.mathworks.com)).

216 Raw EEG data from all the participants were imported using EEGLAB toolbox (Delorme &  
217 Makeig, 2004) following which they were first filtered using a band-pass filter of 0.1-80 Hz  
218 followed by a notch filter between 45-55 Hz to eliminate line noise at 50 Hz. Post filtering, the  
219 data were visually inspected and the trials with any abnormal or noisy segments (jitters with  
220 very large amplitudes) were removed. Data of two participants were discarded at this step due  
221 to very noisy recordings. Next, the filtered data were re-referenced to the common average.  
222 Epochs of 1000 ms post salient stimulus onset were extracted using trigger information and  
223 were sorted from WT, ST and NT categories. Trial-by-trial detrending of each epoch category  
224 was performed to remove linear trends from the signal. To further remove ocular, muscular  
225 and electrocardiograph artifacts, a threshold of  $\pm 75\mu\text{V}$  was set and trials with a magnitude

226 beyond this threshold at any time-point were rejected from all the channels. Overall, about 70%  
227 of the trials for each task condition from each subject were preserved after artifact rejection.

228

## 229 **Behavioral Analysis**

230 The reaction times and accuracies of all the trials were calculated. Since attention is a key  
231 component in our experiment and any form of distraction (internal/external) could shift  
232 attention away from the task, blocks with response accuracies less than 70% (less than 6% of  
233 all blocks) were excluded from further analysis. To decrease the number of false positives and  
234 minimizing chances of including responses made without the involvement of attention, all  
235 incorrect trials including the skipped trials were also excluded. Data from one participant were  
236 discarded due to very poor performance specifically in dynamic task trials. To rule out the  
237 possibility of incorrect responses being made because of a specific directional bias in any  
238 participant, we computed the percentage of incorrect responses for each direction and found  
239 that it was nearly the same for all directions in each individual.

240 From the remaining 19 participants, the reaction times of the correct trials were sorted and  
241 averaged across all the participants for both static and dynamic tasks. The reaction time was  
242 the duration from the onset of the stimulus till the participant hit the response button. For the  
243 NT, any response was considered as correct.

244

## 245 **Spectral Analysis**

246 To understand the neural correlates of the behavior and hence, the processing of saliency by  
247 the brain, we looked at the constituent frequencies from 0.1-80 Hz in the individual trial  
248 categories of both the tasks. Power spectrum analysis was performed on the EEG time series

249 data for the 19 participants. To ensure an equal contribution of trials from each participant, the  
250 number of trials from the participant with the minimum number of remaining trials after artifact  
251 rejection was chosen for further analysis. Those many trials were randomly sampled and  
252 extracted from all the three categories for each participant. Since 35 was the minimum number,  
253 we had a total of 665 (19\*35) trials from each category in both static and dynamic tasks.

254 The analysis scheme was designed in a way that could tease out the effect of the salient  
255 distractor while doing the goal-directed task and therefore, a time window of 1000 ms from the  
256 onset of saliency was considered (timestamps were matched accordingly for WT and NT).  
257 Using the EEG time-series data, we calculated the power spectral density for each trial  
258 corresponding to all the 64 channels using the multi-taper method (mtspectrumc.m) provided  
259 by Chronux toolbox (Bokil, Andrews, Kulkarni, Mehta, & Mitra, 2010). A standard multi-taper  
260 FFT was used that applied 5 Slepian tapers to each window (time bandwidth product = 3).  
261 Sampling frequency was kept at 1000 Hz and frequencies were estimated between 0.1 to 80  
262 Hz.

263

#### 264 **Source Reconstruction using individual T1 MRI images**

265 To localize the sources of the alpha band activity, we applied a current density technique: exact  
266 low-resolution brain electromagnetic tomography (eLORETA) implemented by the  
267 MATLAB-based Fieldtrip toolbox. eLORETA (Pascual-Marqui, 2007) is a weighted minimum  
268 norm inverse solution that provides exact localization with zero error in the presence of  
269 measurement and structured biological noise. We first created the forward models of individual  
270 participants using their respective T1-weighted structural MRI images (MPRAGE) collected  
271 from a Philips Achieva 3.0 T MRI scanner using the following acquisition parameters: TR =  
272 8.4 ms, FOV = 250 X 230 X 170, flip angle = 8 degrees, and fiducials marked at nasion, left

273 and right pre-auricular points with Vitamin E capsules. The origin of all the T1 images was set  
274 to the anterior commissure using SPM 8 before generating individual head models. Using  
275 Boundary Element Method (BEM), the brain was segmented into a mesh/grid based on the  
276 geometrical and tissue properties of the brain. The Polhemus data with the electrode locations  
277 of individual subjects, was then fitted over these individual head models co-registered to the  
278 MRI fiducial points to create the leadfield matrix corresponding to each participant. For a  
279 frequency-domain source analysis, the cross-spectral density (CSD) matrix, which contains the  
280 cross-spectral densities for all sensor combinations, was computed for individual participants  
281 from the Fourier transformed data for the alpha frequency band (8-12 Hz).

282 Using the CSD matrix and the lead field matrix, a spatial filter was calculated for each grid  
283 point. By applying this spatial filter to both the trial conditions (WT and ST) separately, the  
284 power estimate for each grid point was obtained. For calculating the source power, a common  
285 filter approach was used to ensure that the differences in source power across the two trial  
286 conditions were actually because of differences in the brain activity and not because of  
287 differences in the filter output (which might arise due to variations in the signal-to-noise ratio  
288 and subsequently varying CSD matrices) in the two trial conditions (WT and ST). Using this  
289 common inverse filter, the net source power was computed for each participant and the  
290 individual grids were interpolated with their respective T1 weighted images followed by  
291 normalization over a common Colin 27 brain template. The statistical threshold was set at 99%  
292 significance level to define activated sources of alpha enhancement.

293

#### 294 **Source Time-series Reconstruction**

295 From the thresholded grid points, we reconstructed the time series for the activated ROIs at the  
296 source level by multiplying the spatial filter with the artifact rejected time-series data

297 using common electrode placements for all individuals computed by taking the average of their  
298 normalized 3-D locations. The projection of the filter onto the EEG time series data for each  
299 task condition yielded 3 source dipole time-series with their orientations along the x, y and z  
300 directions. Since the interpretation of results becomes difficult while dealing with three dipole  
301 orientations, the time-series were projected along the strongest dipole direction. This was done  
302 by determining the largest (temporal) eigenvector corresponding to the first singular  
303 value. Using these reconstructed time series, connectivity analyses were done for each task  
304 condition to look for effective connectivity between the sources involved in processing  
305 saliency.

306

### 307 **Effective Connectivity Analysis**

308 To understand the directional interactions between the sources, effective connectivity was  
309 calculated using conditional Granger Causality in the time domain using a Causality Estimating  
310 Software (<https://www.dcs.warwick.ac.uk/~feng/causality.html>). This software uses a time-  
311 varying Granger Causality approach catered to deal with non-stationary time series of  
312 EEG/MEG data, unlike the traditional Granger Causality methods that fit a time-invariant  
313 multivariate autoregressive model (MVAR) to the time series.

314 The reconstructed time-series from each participant was treated as a trial, leading to  
315 reconstruction of 19 trials from 19 participants. One participant's data from the dynamic  
316 stimulus was removed as the reconstructed time series data was very noisy. To further reduce  
317 non-stationarity, all the reconstructed time series were bandpass filtered between 5-45Hz to  
318 minimize the effects of evoked potentials. A connectivity matrix was created between all the  
319 nodes (7 X 7 for dynamic stimulus and 5 X 5 for static stimulus). The time series data for each  
320 node was subjected to 50 rounds of bootstrapping from which the mean Granger causality value

321 for each causation combination was obtained. To test the statistical significance of these values,  
322 a 95% confidence interval was generated empirically from a null distribution by random  
323 permutation of the time series across all the nodes and trials for 50 times. Subsequently,  
324 Granger causality estimates were obtained for these 50 iterations, and the mean and the  
325 standard deviation were computed from the GC values to compute the confidence interval at  
326 95% significance.



## 327 **RESULTS**

### 328 **Behavioral responses to saliency in static and dynamic tasks**

329 The mean and standard error of the mean of the reaction times of all the trial categories NT,  
330 WT and ST are shown in **Figure 2** for dynamic and static tasks. Statistical significance was  
331 computed using Wilcoxon rank-sum test where the null hypothesis of no significant difference  
332 between reaction times of any two categories in a task condition was tested at 95% confidence  
333 level. The reaction times showed a significant difference (NT>WT at  $p<0.0001$ , NT>ST at  
334  $p<0.0001$  and ST>WT at  $p=0.012$  in dynamic task; NT>WT at  $p<0.0001$ , NT>ST at  $p<0.0001$   
335 and ST>WT at  $p<0.0001$  in static task) between each trial category within a task and followed  
336 a similar pattern of reaction time relationship in both the tasks which was: NT >ST > WT.

337

### 338 **Alpha modulations associated with the reorientation of attention towards salient** 339 **distractor in static and dynamic tasks**

340 The power spectra were calculated for WT, ST and NT of all the participants trial-by-trial,  
341 which was subsequently averaged and collapsed across all the 64 sensors for both the task  
342 conditions: dynamic and static. **Figure 3** compares the normalized power spectra for ST, WT  
343 and NT. Though all the trial categories in a task followed the same pattern of power spectra,  
344 the power of the alpha frequency band (8-12 Hz) was higher for the ST as compared to the WT  
345 and the NT. Interestingly, this pattern was seen in case of both dynamic and static stimuli. To  
346 test out the statistical significance of the increased alpha power, we employed a non-parametric  
347 Wilcoxon rank-sum test which revealed that alpha power significantly increased in ST as  
348 compared to WT ( $p=0.002$ ) and NT ( $p<0.001$ ) for the static stimulus condition between 8 to 11  
349 Hz at 95% confidence level. Similarly, in the dynamic stimulus condition, there was a  
350 significant increase ( $p = 0.04$ ) in the alpha power of ST as compared to WT between 8 to 11

351 Hz. The increase of power in ST as compared to NT was however, not that significant ( $p =$   
352 0.06). To verify the robustness of this alpha enhancement pattern and find the peak alpha  
353 frequency, we employed a detrending method and compared the alpha power spectra of NT,  
354 WT and ST conditions. Here, we modeled the  $1/f$  trend of the log-transformed power spectrum  
355 and subtracted this trend from our original power spectrum data. This detrended power  
356 spectrum was then plotted for the entire alpha frequency range between 7 to 14 Hz.  
357 Interestingly, the enhanced power of ST had a peak frequency at 10 Hz for both the static and  
358 the dynamic tasks (**insets to Figure 3**).

359 The topoplots for dynamic and static stimulus processing conditions were plotted (**insets to**  
360 **Figure 3**) for the peak alpha frequency (~10 Hz) using the formula of alpha modulation index  
361 (AMI) (Sokoliuk et al., 2019).

$$362 \text{ Net increase in alpha power in ST} = \frac{\text{Sensor power of ST} - \text{Sensor power of WT}}{0.5 * (\text{Sensor power of ST} + \text{Sensor power of WT})} \quad (1)$$

363 Sensors Fz, F3, F5, F7, FC5, FT7, CP5, TP7, CP4, CP6, P4, P6, P8, PO4, PO6, PO8 and O2  
364 showed the maximum increase in their peak alpha powers at 10 Hz in ST in the dynamic task.  
365 Similarly, sensors AF3, F1, F3, F5, F6, F7, FC5, FT7, T7, TP7, CP2, CP4, CP6, TP8, P2, P4,  
366 P6, PO3, PO4 and PO6 showed the maximum alpha power increase at 10 Hz in the static task.  
367 Overall, in both the tasks, enhanced alpha power concentrated around the centro-parietal,  
368 parietal, parieto-occipital and temporo-parietal sensors on the right; and on the frontal, fronto-  
369 central and temporo-parietal sensors on the left.

370

### 371 **The underlying sources of saliency related alpha activity in static and dynamic tasks**

372 The underlying sources responsible for the enhanced alpha power in ST with respect to WT  
373 were calculated using the same formula of alpha modulation index (AMI) at the peak alpha

374 frequency (~10 Hz) after computing the individual sources for ST and WT using eLORETA  
375 (as described in methods).

376 The relative difference in source powers during ST and WT conditions produced the residual  
377 source powers. We argue that the dynamic or static task-specific information was thus negated  
378 and the residuals reflect the effect of saliency only. The source powers for all participants were  
379 grand-averaged and tested for statistical significance. The grid points that survived 99<sup>th</sup>  
380 percentile threshold, were considered as significant sources of activation in response to salient  
381 distractors. For the purpose of plotting, the source coordinates in the 3-D voxel space were  
382 projected to a surface plot as represented in **Figure 4** using customized MATLAB codes.  
383 Spurious activations towards the center of the brain arising from noise were removed by  
384 masking the grid points deep inside the brain with an ellipsoid of optimum radii centered at the  
385 anterior commissure.

386 The underlying sources of alpha enhancement in the dynamic task were the left and the right  
387 anterior temporo-parietal junction (supramarginal gyrus), right posterior temporo-parietal  
388 junction (angular gyrus), the right insula, the lateral prefrontal cortex and regions from the left  
389 and the right visual cortex.

390 The sources corresponding to alpha power enhancement in static task were the left and the right  
391 anterior temporo-parietal junction (supramarginal gyrus), the right insula, the right lateral  
392 prefrontal cortex (including the inferior frontal gyrus) and regions from the right visual cortex.

393 Since the reconstructed time series obtained using the thresholded sources consisted of very  
394 few (~1000) grid points from the entire brain, we reconstructed the sources again with a lower  
395 threshold (98<sup>th</sup> percentile), to get more number of grid points. Even though the number of grid  
396 points increased upon lowering the threshold, the anatomical landmarks corresponding to  
397 source locations did not show much difference overall. Further, using k-means clustering, these

398 sources were classified into nodes based on the centroid of the sources. Sources corresponding  
399 to the dynamic task were classified into 7 nodes whereas for the static task, they were classified  
400 into 5 nodes. All the regions corresponding to these nodes with their respective coordinates  
401 (approximated to the nearest Brodmann areas) have been listed in **Table 2**.

402 The observed alpha power enhancement during dynamic stimulus processing correspond to  
403 two sub-regions of the right TPJ: the anterior and the posterior right TPJ. To further confirm  
404 those were not just two clusters obtained from a single big region due to a limitation of the  
405 clustering algorithm, we calculated the Euclidean distance between the right anterior and  
406 posterior TPJ based on their coordinates, which was equal to 28.80 mm, which showed that the  
407 two sub-regions were considerably far apart to be considered as two distinct ROIs. We have  
408 also checked the consistency of these two sources at an individual subject level. In total, 18 out  
409 of the 19 participants showed activations in both the anterior and posterior TPJ at 99<sup>th</sup> percentile  
410 threshold while the remaining one participant exhibited the same upon further lowering the  
411 threshold to 95<sup>th</sup> percentile.

412

### 413 **Effective brain network connectivity while processing saliency in static and dynamic** 414 **tasks**

415 Source time series computed from 7 sources in dynamic stimulus and 5 sources in static  
416 stimulus processing conditions were subjected to Granger causality (GC) analysis to  
417 understand the directional influence between the sources. Out of all the significant functional  
418 connections (95% confidence interval) from a total of 42 possible connections during dynamic  
419 stimulus processing and 20 such connections during static stimulus processing, we chose to  
420 focus on the top 50 percentile connections that had a relatively high GC as illustrated in **Figure**  
421 **5**.

422 Granger causality revealed the following causal influences:

423 Right Visual Area → Right Insula, Right Visual Area → Right anterior TPJ, Right Visual Area  
424 → Right lateral PFC, Right Insula → Right posterior TPJ, Right anterior TPJ → Right posterior  
425 TPJ, Right anterior TPJ → Left Visual Area for dynamic viewing and the following ones: Right  
426 Visual Area → Right Insula, Right Visual Area → Right anterior TPJ, Left anterior TPJ →  
427 Right anterior TPJ for static viewing conditions.

428 The brain networks were visualized using BrainNet Viewer (Xia, Wang, & He, 2013). Overall,  
429 there is clearly a right hemispheric dominance of network interactions during saliency  
430 processing in both static and dynamic tasks.

## 431 **DISCUSSION**

432 Our results show that the underlying neural oscillations mediating the activation of the salience  
433 driven attentional sources (mostly regions of the Ventral Attention Network) leading to the  
434 reorientation of attention from a goal-directed task come from the alpha frequency band (8-12  
435 Hz).

### 436 **Increased response times in salient trials as an outcome of two neural sub-processes**

437 The behavioral results indicate that the salient distractor in the ST might have contributed to  
438 the increased latency in reaction time (Noonan et al., 2016). This can be attributed to both the  
439 ‘pop-out’ property of the salient distractor which leads to attentional reorientation towards it,  
440 as well as the orientation back to the goal driven task. These two processes are absent in WT  
441 and hence they have a comparatively shorter reaction time. Since these results indicate that the  
442 salient distractor has been attended in ST, it is imperative that it is a consequence of cortical  
443 information processing. However, the NT, which had no possible correct responses and yet  
444 required a goal directed attention, resulted in higher RTs possibly reflecting the role of  
445 increased cognitive load/ task complexity. Hence, it is important to characterize whether the  
446 neural dynamics corresponding to salient stimulus is due to an attentional shift alone or  
447 attention combined with task complexity.

448

### 449 **Alpha power enhancement related to saliency trials invariant across task conditions**

450 One view regarding the role of alpha oscillations is that an increase in alpha power reflects  
451 distractor suppression, whereas a decrease in alpha power reflects release from suppression  
452 (Fries, Reynolds, Rorie, & Desimone, 2001; Fu et al., 2001; Jensen & Mazaheri, 2010;  
453 Klimesch, 2012). Also well-established is the fact that increased parietal alpha synchrony (8–

454 12 Hz) in one hemisphere is associated with reduced attention in the contralateral visual field  
455 such that the distractor can possibly be ignored (Foxe, Simpson, & Ahlfors, 1998; Worden,  
456 Foxe, Wang, & Simpson, 2000; Foxe, Simpson, Ahlfors, & Saron, 2005; Snyder & Foxe, 2010;  
457 Banerjee, Snyder, Molholm, & Foxe, 2011; Zumer, Scheeringa, Schoffelen, Norris, & Jensen,  
458 2014; Liu, Bengson, Huang, Mangun, & Ding, 2014; Feng, Störmer, Martinez, McDonald, &  
459 Hillyard, 2017).

460 In accordance to these findings, our power spectral density results reveal there was a significant  
461 enhancement in the alpha power of ST as compared to WT and NT with no significant changes  
462 between WT and NT. Interestingly, the pattern of enhancement was very similar for the static  
463 and dynamic stimulus conditions in terms of the peak frequency (~10Hz) and the magnitude of  
464 the enhanced power. This pattern of similarity is suggestive of a more task-independent role of  
465 alpha while processing salient distractors, that does not depend on the task condition *per se* but  
466 is mostly a consequence of the context of the task, which in this case is saliency. Furthermore,  
467 alpha power levels for WT and NT didn't show any significant difference, though their reaction  
468 times were significantly different. This rules out the possibility of alpha increase stemming  
469 from task complexity. Nonetheless, to explicitly explore the trend we computed the peak alpha  
470 power of all participants and checked their correlation with reaction times, and not surprisingly  
471 no significant differences were observed.

472 In line with our work, a recent study showed that distraction suppression through alpha  
473 oscillations does not depend on the spatial location of the target through an auditory spatial  
474 pitch discrimination task (Wöstmann, Alavash, & Obleser, 2019). In real life situations  
475 however, we constantly interact with a variety of stimulus conditions and it is important to  
476 characterize how is distractor suppression modulated with the various stimulus conditions so  
477 that a neural marker for saliency can be established.

478

479 **Common sources of alpha activity to process saliency across dynamic and static task**  
480 **conditions**

481 The topoplots at peak alpha power indicated the presence of a possible overlap in the right  
482 centro-parietal and parieto-occipital regions of cortex for processing saliency related  
483 information and guided us to further delve into the source space. Source reconstruction results  
484 revealed that most of the sources were overlapping in the two task conditions. The right insula,  
485 the right anterior temporo-parietal junction (TPJ), the right lateral prefrontal cortex and the  
486 right visual association areas showed source activations underlying alpha enhancement in both  
487 static and dynamic stimulus conditions. The aforementioned regions have been extensively  
488 shown to be involved in the processing of salient stimuli in previous fMRI studies and are also  
489 a part of the Ventral Attention Network (VAN) which is mostly right lateralized (Schuwerk,  
490 Schurz, Müller, Rupprecht, & Sommer, 2017; Eddy, 2016; Krall et al., 2015; Han & Marois,  
491 2014). TPJ has been shown to have a role that kicks in later during stimulus driven attentional  
492 reorientation and in the integration of internal representations of task context with stimulus and  
493 response expectations (Geng & Vossel, 2013). An additional observation from our source  
494 reconstruction results was the behavioral relevance specific posterior TPJ activation in the  
495 dynamic stimulus condition that is not seen in the static task condition. Extant studies (Corbetta  
496 & Shulman, 2002; Corbetta et al., 2008) suggest that the right TPJ shows activation in response  
497 to salient distractors that are only behaviorally relevant (Huang, Tang, Sun, & Luo, 2018). A  
498 salient distractor can be considered to be behaviorally relevant if it shares features with the  
499 target of the task. The salient distractor in the dynamic task condition was hence behaviorally  
500 relevant to the task (differently sized/ colored dot amidst other dots) whereas in the static task  
501 condition it was not (complex naturalistic objects as opposed to a target which was a basic



502 geometrical shape '+'). Using diffusion-weighted imaging tractography-based parcellation,  
503 Mars and colleagues demarcated TPJ into 3 distinct sub regions: anterior TPJ (supra-marginal  
504 gyrus), posterior TPJ (angular gyrus) and the dorsal TPJ (middle part of the inferior parietal  
505 lobule) (Mars et al., 2012; Carter & Huettel, 2013; Geng & Vossel, 2013). The first two sub-  
506 regions are consistent with our source reconstruction results. Similar studies by Kubit and Jack  
507 (2013), identified these TPJ sub-regions to be associated with target detection, oddball  
508 identification and mentalization/ social cognition, respectively.

509

510 **Directional causality from anterior to posterior rTPJ for behaviorally relevant salient**  
511 **stimuli**

512 Identification of the almost common set of brain areas underlying alpha enhancement across  
513 dynamic and static stimuli warrants the understanding of the causal relationships among the  
514 candidate nodes. Granger Causality analysis on dynamic viewing condition revealed that the  
515 posterior TPJ is driven by the anterior TPJ. Posterior TPJ has been shown to be associated with  
516 identification and evaluation based processes in oddballs (Kubit & Jack, 2013). The anterior  
517 TPJ on the other hand, has exclusively been reported to be a part of the ventral attention  
518 network (VAN) and is responsible for the reorientation of attention whenever faced with a  
519 salient distractor (Rennig, Himmelbach, Huberle, & Karnath, 2015; Igelström, Webb, &  
520 Graziano, 2015), which is perhaps a transient process involved in the switch of attention from  
521 the task goals to a salient distractor (Han & Marois, 2014). If the salient distractor is  
522 behaviourally inconsequential, based on comparison of sensory information to internal  
523 representations (Krall et al., 2015), attention is oriented back to the task at hand. Based on our  
524 connectivity results, we propose that a behaviorally relevant salient distractor (as in the case of  
525 dynamic task) is further processed in the posterior rTPJ which evaluates the contents of the

526 distractor and subsequently plays a gating role in driving the attentional requirements. Thus,  
527 the behaviourally relevant distractor is prioritized over a behaviourally irrelevant one at the  
528 stage of anterior TPJ such that the latter is not forwarded for further processing. On this view,  
529 a recent study has reported that the TPJ does not directly compute the relevance of a stimulus  
530 feature, but modulates its response to stimuli according to the top-down biasing of signals to  
531 control the engagement of attention to potentially distracting information that is behaviorally  
532 relevant to the task (Pedrazzini & Ptak, 2019).

533

### 534 **Posterior rTPJ has a decisive role in reorientation of attention**

535 Finally, as a prospective avenue for future research, we speculate that characterizing the various  
536 sub-regions of TPJ will probably be of critical importance to neuroscience in order to  
537 understand the subtle variations of attentional processing, both for spatial as well as spatio-  
538 temporally enriched stimuli. Although, various studies have explicitly mentioned about the  
539 sub-regions of TPJ in this regard, we would like to go a step forward and propose that the  
540 posterior TPJ receives top-down biasing signals from the anterior TPJ that help modulate our  
541 responses based on the relevance of a distractor to a putative task. We note that such a crucial  
542 claim over the spatial anatomy of a sub-region just based on an EEG study comes with several  
543 limitations, nonetheless, underpinning the transient changes in neural dynamics associated with  
544 the processing of saliency and the attentional reorientation that follows, require temporal  
545 precision which is difficult to achieve through other neuroimaging techniques like fMRI.  
546 Recently, some evidences have shown that the detection of very focal activations for cortical  
547 sources may be possible using EEG source reconstruction (Halder, Talwar, Jaiswal, &  
548 Banerjee, 2019).

549

550 **REFERENCES**

- 551 Banerjee, S., Snyder, A. C., Molholm, S., & Foxe, J. J. (2011). Oscillatory alpha-band  
552 mechanisms and the deployment of spatial attention to anticipated auditory and visual  
553 target locations: Supramodal or sensory-specific control mechanisms? *Journal of*  
554 *Neuroscience*, *31*(27), 9923–9932. <https://doi.org/10.1523/JNEUROSCI.4660-10.2011>
- 555 Battelli, L., Cavanagh, P., Intriligator, J., Tramo, M. J., Hénaff, M.-A., Michèl, F., & Barton,  
556 J. J. S. (2001). Unilateral Right Parietal Damage Leads to Bilateral Deficit for High-Level  
557 Motion. *Neuron*, *32*(6), 985–995. [https://doi.org/10.1016/S0896-6273\(01\)00536-0](https://doi.org/10.1016/S0896-6273(01)00536-0)
- 558 Battelli, L., Pascual-Leone, A., & Cavanagh, P. (2007). The ‘when’ pathway of the right  
559 parietal lobe. *Trends in Cognitive Sciences*, *11*(5), 204–210.  
560 <https://doi.org/10.1016/j.tics.2007.03.001>
- 561 Bokil, H., Andrews, P., Kulkarni, J. E., Mehta, S., & Mitra, P. P. (2010). Chronux: A platform  
562 for analyzing neural signals. *Journal of Neuroscience Methods*, *192*(1), 146–151.  
563 <https://doi.org/10.1016/j.jneumeth.2010.06.020>
- 564 Carter, R. M., & Huettel, S. A. (2013). A nexus model of the temporal-parietal junction. *Trends*  
565 *in Cognitive Sciences*, *17*(7), 328–336. <https://doi.org/10.1016/j.tics.2013.05.007>
- 566 Caspers, S., Geyer, S., Schleicher, A., Mohlberg, H., Amunts, K., & Zilles, K. (2006). The  
567 human inferior parietal cortex: Cytoarchitectonic parcellation and interindividual  
568 variability. *NeuroImage*, *33*(2), 430–448.  
569 <https://doi.org/10.1016/j.neuroimage.2006.06.054>
- 570 Cavanagh, P., & Alvarez, G. (2005). Tracking multiple targets with multifocal attention. *Trends*  
571 *in Cognitive Sciences*, *9*(7), 349–354. <https://doi.org/10.1016/j.tics.2005.05.009>
- 572 Cavanagh, P., Battelli, L., & Holcombe, A. O. (2014). *Dynamic attention Introduction:*  
573 *Tracking Events as They Unfold in Time*. Retrieved from

- 574 <https://cavlab.net/MyRWResources/MyPDFs/PDF2014/Cavanaghetal2014.pdf>
- 575
- 576 Corbetta, M., Patel, G., & Shulman, G. L. (2008). The Reorienting System of the Human Brain:  
577 From Environment to Theory of Mind. *Neuron*, 58(3), 306–324.  
578 <https://doi.org/10.1016/j.neuron.2008.04.017>
- 579 Corbetta, M., & Shulman, G. L. (2002). Control of Goal-Directed and Stimulus-Driven  
580 Attention in the Brain. *Nature Reviews Neuroscience*, 3(3), 215–229.  
581 <https://doi.org/10.1038/nrn755>
- 582 Decety, J., & Lamm, C. (2007). The Role of the Right Temporoparietal Junction in Social  
583 Interaction: How Low-Level Computational Processes Contribute to Meta-Cognition. *The*  
584 *Neuroscientist*, 13(6), 580–593. <https://doi.org/10.1177/1073858407304654>
- 585 Delorme, A., & Makeig, S. (2004). EEGLAB: An open source toolbox for analysis of single-  
586 trial EEG dynamics including independent component analysis. *Journal of Neuroscience*  
587 *Methods*, 134(1), 9–21. <https://doi.org/10.1016/j.jneumeth.2003.10.009>
- 588 Eddy, C. M. (2016). The junction between self and other? Temporo-parietal dysfunction in  
589 neuropsychiatry. *Neuropsychologia*, 89, 465–477.  
590 <https://doi.org/10.1016/J.NEUROPSYCHOLOGIA.2016.07.030>
- 591 Feng, W., Störmer, V. S., Martinez, A., McDonald, J. J., & Hillyard, S. A. (2017). Involuntary  
592 orienting of attention to a sound desynchronizes the occipital alpha rhythm and improves  
593 visual perception. *NeuroImage*, 150, 318–328.  
594 <https://doi.org/10.1016/j.neuroimage.2017.02.033>
- 595 Foxe, J. J., Simpson, G. V., & Ahlfors, S. P. (1998). Parieto-occipital ~10 Hz activity reflects  
596 anticipatory state of visual attention mechanisms. *NeuroReport*, 9(17), 3929–3933.  
597 <https://doi.org/10.1097/00001756-199812010-00030>

- 598 Foxe, J. J., Simpson, G. V., Ahlfors, S. P., & Saron, C. D. (2005). Biasing the brain's attentional  
599 set: I. Cue driven deployments of intersensory selective attention. In *Experimental Brain*  
600 *Research* (Vol. 166, pp. 370–392). <https://doi.org/10.1007/s00221-005-2378-7>
- 601 Fries, P., Reynolds, J. H., Rorie, A. E., & Desimone, R. (2001). Modulation of oscillatory  
602 neuronal synchronization by selective visual attention. *Science*, *291*(5508), 1560–1563.  
603 <https://doi.org/10.1126/science.1055465>
- 604 Fu, K. M. G., Foxe, J. J., Murray, M. M., Higgins, B. A., Javitt, D. C., & Schroeder, C. E.  
605 (2001). Attention-dependent suppression of distracter visual input can be cross-modally  
606 cued as indexed by anticipatory parieto-occipital alpha-band oscillations. *Cognitive Brain*  
607 *Research*, *12*(1), 145–152. [https://doi.org/10.1016/S0926-6410\(01\)00034-9](https://doi.org/10.1016/S0926-6410(01)00034-9)
- 608 Geng, J. J., & Vossel, S. (2013). Re-evaluating the role of TPJ in attentional control: Contextual  
609 updating? *Neuroscience & Biobehavioral Reviews*, *37*(10), 2608–2620.  
610 <https://doi.org/10.1016/J.NEUBIOREV.2013.08.010>
- 611 Halder, T., Talwar, S., Jaiswal, A. K., & Banerjee, A. (2019). Quantitative Evaluation in  
612 Estimating Sources Underlying Brain Oscillations Using Current Source Density Methods  
613 and Beamformer Approaches. *Eneuro*, *6*(4), ENEURO.0170-19.2019.  
614 <https://doi.org/10.1523/eneuro.0170-19.2019>
- 615 Han, S. W., & Marois, R. (2014). Functional fractionation of the stimulus-driven attention  
616 network. *The Journal of Neuroscience: The Official Journal of the Society for*  
617 *Neuroscience*, *34*(20), 6958–6969. <https://doi.org/10.1523/JNEUROSCI.4975-13.2014>
- 618 Huang, F., Tang, S., Sun, P., & Luo, J. (2018). Neural correlates of novelty and appropriateness  
619 processing in externally induced constraint relaxation. *NeuroImage*, *172*, 381–389.  
620 <https://doi.org/10.1016/J.NEUROIMAGE.2018.01.070>

- 621 Igelström, K. M., Webb, T. W., & Graziano, M. S. A. (2015). Neural Processes in the Human  
622 Temporoparietal Cortex Separated by Localized Independent Component Analysis. *The*  
623 *Journal of Neuroscience : The Official Journal of the Society for Neuroscience*, 35(25),  
624 9432–9445. <https://doi.org/10.1523/JNEUROSCI.0551-15.2015>
- 625 Janssen, T. W. P., Heslenfeld, D. J., van Mourik, R., Geladé, K., Maras, A., & Oosterlaan, J.  
626 (2015). Alterations in the Ventral Attention Network During the Stop-Signal Task in  
627 Children With ADHD: An Event-Related Potential Source Imaging Study. *Journal of*  
628 *Attention Disorders*, 1087054715580847-. <https://doi.org/10.1177/1087054715580847>
- 629 Jensen, O., & Mazaheri, A. (2010). Shaping functional architecture by oscillatory alpha  
630 activity: Gating by inhibition. *Frontiers in Human Neuroscience*, 4.  
631 <https://doi.org/10.3389/fnhum.2010.00186>
- 632 Karnath, H.-O. (2015). Spatial attention systems in spatial neglect. *Neuropsychologia*, 75, 61–  
633 73. <https://doi.org/10.1016/j.neuropsychologia.2015.05.019>
- 634 Klimesch, W. (2012, December). Alpha-band oscillations, attention, and controlled access to  
635 stored information. *Trends in Cognitive Sciences*.  
636 <https://doi.org/10.1016/j.tics.2012.10.007>
- 637 Krall, S. C., Rottschy, C., Oberwelland, E., Bzdok, D., Fox, P. T., Eickhoff, S. B., ... Konrad,  
638 K. (2015). The role of the right temporoparietal junction in attention and social interaction  
639 as revealed by ALE meta-analysis. *Brain Structure and Function*, 220(2), 587–604.  
640 <https://doi.org/10.1007/s00429-014-0803-z>
- 641 Kubit, B., & Jack, A. I. (2013). Rethinking the role of the rTPJ in attention and social cognition  
642 in light of the opposing domains hypothesis: findings from an ALE-based meta-analysis  
643 and resting-state functional connectivity. *Frontiers in Human Neuroscience*, 7, 323.  
644 <https://doi.org/10.3389/fnhum.2013.00323>

- 645 Kulikowski, J. J., & Tolhurst, D. J. (1973). Psychophysical evidence for sustained and transient  
646 detectors in human vision. *The Journal of Physiology*, 232(1), 149–162.  
647 <https://doi.org/10.1113/jphysiol.1973.sp010261>
- 648 Liu, Y., Bengson, J., Huang, H., Mangun, G. R., & Ding, M. (2014). Top-down Modulation of  
649 Neural Activity in Anticipatory Visual Attention: Control Mechanisms Revealed by  
650 Simultaneous EEG-fMRI. *Cerebral Cortex*, bhu204.  
651 <https://doi.org/10.1093/cercor/bhu204>
- 652 Lynch, C. J. (2014). Towards a reconceptualization of the temporoparietal junction in stimulus-  
653 driven attention. *The Journal of Neuroscience : The Official Journal of the Society for*  
654 *Neuroscience*, 34(40), 13277–13278. <https://doi.org/10.1523/JNEUROSCI.2996-14.2014>
- 655 Mars, R. B., Sallet, J., Schuffelgen, U., Jbabdi, S., Toni, I., & Rushworth, M. F. S. (2012).  
656 Connectivity-Based Subdivisions of the Human Right “Temporoparietal Junction Area”:  
657 Evidence for Different Areas Participating in Different Cortical Networks. *Cerebral*  
658 *Cortex*, 22(8), 1894–1903. <https://doi.org/10.1093/cercor/bhr268>
- 659 Menon, V., & Uddin, L. Q. (2010). Saliency, switching, attention and control: a network model  
660 of insula function. *Brain Structure & Function*, 214(5–6), 655–667.  
661 <https://doi.org/10.1007/s00429-010-0262-0>
- 662 Noonan, M. A. P., Adamian, N., Pike, A., Printzlaw, F., Crittenden, B. M., & Stokes, M. G.  
663 (2016). Distinct mechanisms for distractor suppression and target facilitation. *Journal of*  
664 *Neuroscience*, 36(6), 1797–1807. <https://doi.org/10.1523/JNEUROSCI.2133-15.2016>
- 665 Pascual-Marqui, R. D. (2007). Discrete, 3D distributed, linear imaging methods of electric  
666 neuronal activity. Part 1: exact, zero error localization. Retrieved from  
667 <http://arxiv.org/abs/0710.3341>

- 668 Pedrazzini, E., & Ptak, R. (2019). Damage to the right temporoparietal junction, but not lateral  
669 prefrontal or insular cortex, amplifies the role of goal-directed attention. *Scientific*  
670 *Reports*, 9(1), 306. <https://doi.org/10.1038/s41598-018-36537-3>
- 671 Rennig, J., Himmelbach, M., Huberle, E., & Karnath, H.-O. (2015). Involvement of the TPJ  
672 Area in Processing of Novel Global Forms. *Journal of Cognitive Neuroscience*, 27(8),  
673 1587–1600. [https://doi.org/10.1162/jocn\\_a\\_00809](https://doi.org/10.1162/jocn_a_00809)
- 674 Schuwerk, T., Schurz, M., Müller, F., Rupprecht, R., & Sommer, M. (2017). The rTPJ's  
675 overarching cognitive function in networks for attention and theory of mind. *Social*  
676 *Cognitive and Affective Neuroscience*, 12(1), 157–168.  
677 <https://doi.org/10.1093/scan/nsw163>
- 678 Sokoliuk, R., Mayhew, S. D., Aquino, K. M., Wilson, R., Brookes, M. J., Francis, S. T., ...  
679 Mullinger, K. J. (2019). Two spatially distinct posterior alpha sources fulfill different  
680 functional roles in attention. *The Journal of Neuroscience : The Official Journal of the*  
681 *Society for Neuroscience*, 39(18), 3693–3704. <https://doi.org/10.1523/JNEUROSCI.1993-18.2019>
- 682 Stigliani, A., Jeska, B., & Grill-Spector, K. (2017). Encoding model of temporal processing in  
683 human visual cortex. *Proceedings of the National Academy of Sciences of the United*  
684 *States of America*, 114(51), E11047–E11056. <https://doi.org/10.1073/pnas.1704877114>
- 685 Teichert, T., Grinband, J., & Ferrera, V. (2016). The importance of decision onset. *Journal of*  
686 *Neurophysiology*, 115(2), 643–661. <https://doi.org/10.1152/jn.00274.2015>
- 687 Van Essen, D. C. (2005). A Population-Average, Landmark-and Surface-based (PALS) atlas  
688 of human cerebral cortex. <https://doi.org/10.1016/j.neuroimage.2005.06.058>
- 689 Vossel, S., Geng, J. J., & Fink, G. R. (2014). Dorsal and Ventral Attention Systems. *The*  
690 *Neuroscientist*, 20(2), 150–159. <https://doi.org/10.1177/1073858413494269>
- 691 Worden, M. S., Foxe, J. J., Wang, N., & Simpson, G. V. (2000). Anticipatory biasing of



692 visuospatial attention indexed by retinotopically specific alpha-band  
693 electroencephalography increases over occipital cortex. *The Journal of Neuroscience* :  
694 *The Official Journal of the Society for Neuroscience*, 20(6).  
695 <https://doi.org/10.1523/jneurosci.20-06-j0002.2000>

696 Wöstmann, M., Alavash, M., & Obleser, J. (2019). Alpha oscillations in the human brain  
697 implement distractor suppression independent of target selection. *The Journal of*  
698 *Neuroscience*, 1954–19. <https://doi.org/10.1523/jneurosci.1954-19.2019>

699 Xia, M., Wang, J., & He, Y. (2013). BrainNet Viewer: A Network Visualization Tool for  
700 Human Brain Connectomics. *PLoS ONE*, 8(7).  
701 <https://doi.org/10.1371/journal.pone.0068910>

702 Zumer, J. M., Scheeringa, R., Schoffelen, J.-M., Norris, D. G., & Jensen, O. (2014). Occipital  
703 Alpha Activity during Stimulus Processing Gates the Information Flow to Object-  
704 Selective Cortex. *PLoS Biology*, 12(10), e1001965.  
705 <https://doi.org/10.1371/journal.pbio.1001965>

706

707

## 708 **Legends, tables and figures**

709 **Table 1. Trial distribution across tasks.** The block-wise distribution of the Neutral Trials  
710 (NT), Without Saliency Trials (WT) and Saliency Trials (ST) across the dynamic and the static  
711 stimulus conditions have been listed.

712 **Table 2. Areas involved in processing saliency.** Coordinates of the regions of interests (ROIs)  
713 of the reconstructed sources involved in saliency processing for a) dynamic stimulus condition  
714 and b) static stimulus condition are listed.

715 **Figure 1. Experimental design.** An example of the experimental paradigm used in the study  
716 illustrating the three different categories of trials: neutral trials (NT), without saliency trials  
717 (WT) and saliency trials (ST) is shown along with their presentation durations within a block  
718 which comprised of videos in the (A) Dynamic stimulus condition and static images in the (B)  
719 Static stimulus condition.

720 **Figure 2. Behavior.** The mean and standard error of the mean of neutral trials (NT), without  
721 saliency trials (WT) and saliency trials (ST) from all the nineteen participants are shown for  
722 the two task conditions: (A) Dynamic stimulus condition and (B) Static stimulus condition.  
723 The significant difference between any two categories of trials within a task condition was  
724 tested at 95% confidence interval using Wilcoxon ranksum test (\*\*\*) represents  $p < 0.0001$  and  
725 \*\* represents  $p = 0.012$ ).

726 **Figure 3. Power spectral density.** The figure shows the grand-average of the power spectra  
727 of neutral trials (NT), without saliency trials (WT) and saliency trials (ST) across (A) Dynamic  
728 Stimulus condition and (B) Static Stimulus condition. The boxed regions represent those  
729 frequencies (alpha band, 8-11 Hz) which show a significant increase of power (ST>WT at  
730  $p = 0.002$  and ST>NT at  $p < 0.0001$  in static stimulus condition; ST>WT at  $p = 0.04$  and ST>NT  
731 at  $p = 0.06$  in dynamic stimulus condition) in ST as compared to WT and NT, validated using  
732 Wilcoxon rank-sum test for individual frequency pairs within a condition. The left inset in each  
733 stimulus condition shows that the peak of alpha is at  $\sim 10$  Hz for both (A) Dynamic Stimulus  
734 and (B) Static Stimulus. The right inset in each stimulus condition are topoplots highlighting  
735 the enhancement in alpha peak power ( $\sim 10$ Hz) in ST with respect to WT across the sensor  
736 space computed using the alpha modulation index (AMI).

737 **Figure 4. Source localization.** The figure represents the cortical sources responsible for  
738 processing a salient distractor at the peak alpha frequency ( $\sim 10$  Hz) computed using the alpha

739 modulation index (AMI). The sources that were identified using eLORETA, a weighted  
740 minimum norm inverse solution, were the left and the right anterior temporo-parietal junction,  
741 the right posterior temporo-parietal junction, the right insula, the right lateral prefrontal cortex,  
742 the left and the right visual association areas for (A) Dynamic Stimulus; and the left and the  
743 right anterior temporo-parietal junction, the right insula, the right lateral prefrontal cortex  
744 (including the inferior frontal gyrus), the right visual association areas for (B) Static Stimulus.  
745 All the regions were approximated to the nearest Brodmann areas of the human brain.

746 **Figure 5. Effective Connectivity.** The figure represents the directional influences between the  
747 localized sources responsible for processing a salient distractor for (A) Dynamic Stimulus and  
748 (B) Static Stimulus. The arrows point from the driver node towards the effector node. The  
749 causalities were determined using a time-varying Granger Causality approach on the source  
750 reconstructed time-series data and the figure illustrates the top 50% of all the significant  
751 causations for each stimulus condition.

**Table 1.**

| <b>Trial information</b>       | <b>Dynamic stimulus</b> | <b>Static stimulus</b> |
|--------------------------------|-------------------------|------------------------|
| <i>Total no. of blocks</i>     | 8                       | 8                      |
| <i>No. of trials per block</i> | 70                      | 30                     |
| <i>NT</i>                      | 20                      | 10                     |
| <i>WT</i>                      | 20                      | 10                     |
| <i>ST</i>                      | 30*                     | 10                     |

\*To reduce the drop in the pop-out effect of salient distractors due to habituation after multiple trial presentations, 3 kinds of salient distractors were used, varying in either color or size or both from the other moving dots. 10 trials each of an equisized red, a larger red and a larger

white dot were presented in a block as a salient distractor along with rest of the moving dots in ST.

**Table 2.**

a).

| <b>MNI coordinates of ROIs of dynamic stimulus</b> |          |          |                      |                   |
|----------------------------------------------------|----------|----------|----------------------|-------------------|
| <i>x</i>                                           | <i>y</i> | <i>z</i> | <i>Brodmann area</i> | <i>ROI name</i>   |
| 45.5304                                            | 1.8176   | 7.6352   | 45                   | R. LPFC/IFG       |
| 49.0328                                            | -67.0187 | 6.234    | 19                   | R. visual area    |
| -43.0262                                           | -44.5205 | 8.2927   | 40                   | L. ant. TPJ / SMG |
| -52.8281                                           | -71.4317 | 0.9335   | 19                   | L. visual area    |
| 43.7931                                            | -56.3395 | 28.768   | 39                   | R. post. TPJ / AG |
| 47.7159                                            | -14.6687 | -0.9942  | 13                   | R. insula         |
| 47.8512                                            | -30.7366 | 16.2046  | 40                   | R. ant. TPJ / SMG |

b).

| <b>MNI coordinates of ROIs of static stimulus</b> |          |          |                      |                   |
|---------------------------------------------------|----------|----------|----------------------|-------------------|
| <i>x</i>                                          | <i>y</i> | <i>z</i> | <i>Brodmann area</i> | <i>ROI name</i>   |
| 44.6437                                           | -17.0274 | 13.1784  | 40                   | R. ant. TPJ / SMG |
| -40.6605                                          | -32.5528 | 11.1861  | 40                   | L. ant. TPJ / SMG |
| 45.2284                                           | 0.0653   | -2.7002  | 13                   | R. insula         |
| 41.0606                                           | 15.3615  | 18.6218  | 9                    | R. LPFC           |
| 41.8174                                           | -75.7257 | -3.1578  | 19                   | R. visual area    |

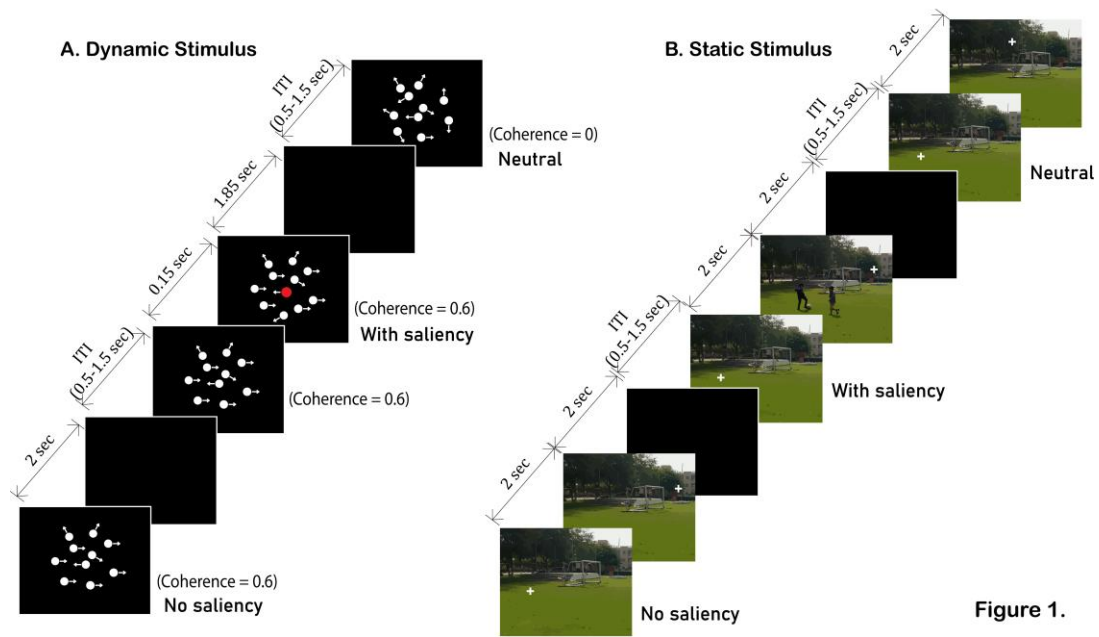

Figure 1.

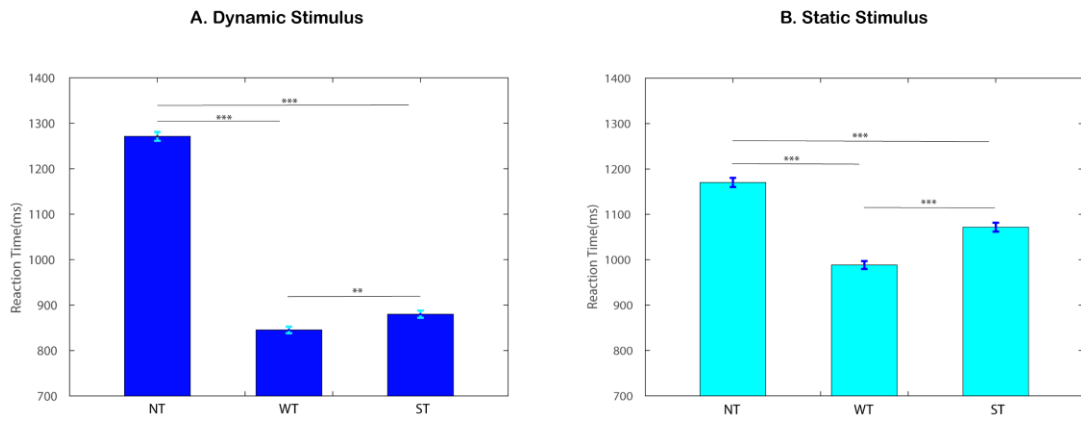

Figure 2.

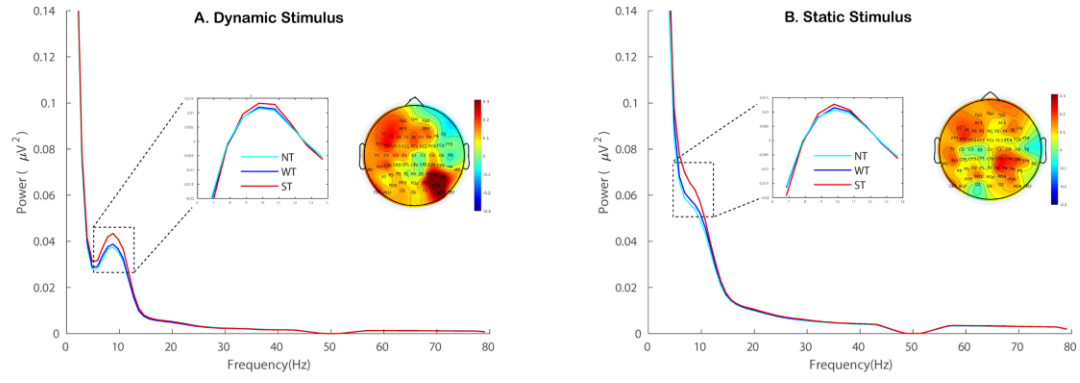

Figure 3.

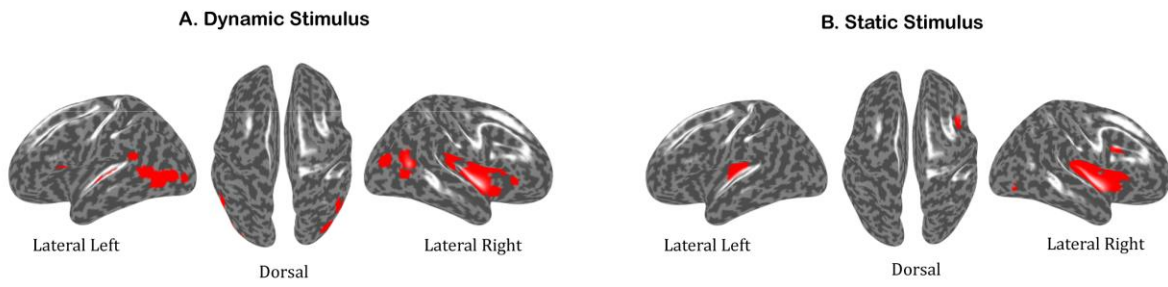

Figure 4.



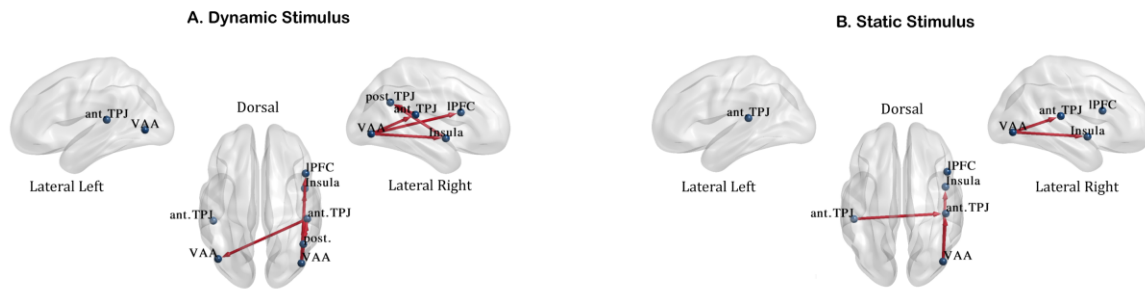

Figure 5.
